1 **Alteration of ribosome function upon 5-fluorouracil treatment favours cancer cell drug-tolerance**

2

3 Gabriel Therizols<sup>1</sup>, Zeina Bash-Imam<sup>1</sup>, Baptiste Panthu<sup>2,10</sup>, Christelle Machon<sup>3,4</sup>, Anne Vincent<sup>1</sup>, Sophie

4 Nait-Slimane<sup>1</sup>, Maxime Garcia<sup>1</sup>, Mounira Chalabi-Dchar<sup>1</sup>, Florian Lafôrets<sup>1</sup>, Virginie Marcel<sup>1</sup>, Jihane

5 Boubaker-Vitre<sup>6</sup>, Guillaume Souahlia<sup>1</sup>, Marie-Alexandra Albaret<sup>1</sup>, Hichem C. Mertani<sup>1</sup>, Michel

6 Prudhomme<sup>7</sup>, Martin Bertrand<sup>7</sup>, Jean-Christophe Saurin<sup>1,8</sup>, Philippe Bouvet<sup>1,9</sup>, Théophile Ohlmann<sup>2</sup>,

7 Jérôme Guitton<sup>4,5</sup>, Nicole Dalla-Venezia<sup>1</sup>, Julie Pannequin<sup>6</sup>, Frédéric Catez<sup>1\*</sup> and Jean-Jacques Diaz<sup>1\*</sup>.

8

9 <sup>1</sup> Inserm U1052, CNRS UMR5286 Centre de Recherche en Cancérologie de Lyon, F-69000 Lyon,

10 France. Centre Léon Bérard, F-69008 Lyon, France, Université de Lyon 1, F-69000 Lyon, France

11 <sup>2</sup> CIRI-Inserm U1111, Ecole Normale Supérieure de Lyon, Lyon F-693643, France

12 <sup>3</sup> Laboratoire de chimie analytique, Faculté de pharmacie de Lyon, 8 avenue Rockefeller, F-69373

13 Lyon, France

14 <sup>4</sup> Laboratoire de biochimie et de pharmaco-toxicologie, Centre hospitalier Lyon-Sud – HCL, F-69495

15 Pierre Bénite, France

16 <sup>5</sup> Laboratoire de toxicologie, Faculté de pharmacie de Lyon, Université de Lyon, 8 avenue Rockefeller,

17 F-69373 Lyon, France

18 <sup>6</sup> IGF, Univ. Montpellier, CNRS, INSERM, Montpellier, France

19 <sup>7</sup> Department of Digestive Surgery, CHU Nimes, Univ Montpellier, Nimes, France

20 <sup>8</sup> Department of Endoscopy and Gastroenterology, Pavillon L, Edouard Herriot Hospital, Lyon, France

21 <sup>9</sup> Ecole Normale Supérieure de Lyon, Lyon, France

22 <sup>10</sup> Current affiliation : Inserm U1060, CARMEN, F-69310 Pierre Bénite

23 \*co-senior authors

1 **Abstract**

2 Partial response to chemotherapy leads to disease resurgence. Upon treatment, a subpopulation of  
3 cancer cells, called drug-tolerant persistent cells, display a transitory drug tolerance that lead to  
4 treatment resistance <sup>1,2</sup>. Though drug-tolerance mechanisms remain poorly known, they have been  
5 linked to non-genomic processes, including epigenetics, stemness and dormancy <sup>2-4</sup>. 5-fluorouracil  
6 (5-FU), the most widely used chemotherapy in cancer treatment, is associated with resistance. While  
7 prescribed as an inhibitor of DNA replication, 5-FU alters all RNA pathways <sup>5-9</sup>. Here, we show that 5-  
8 FU treatment leads to the unexpected production of fluorinated ribosomes, exhibiting altered mRNA  
9 translation. 5-FU is incorporated into ribosomal RNAs of mature ribosomes in cancer cell lines,  
10 colorectal xenografts and human tumours. Fluorinated ribosomes appear to be functional, yet, they  
11 display a selective translational activity towards mRNAs according to the nature of their 5'-  
12 untranslated region. As a result, we found that sustained translation of *IGF-1R* mRNA, which codes  
13 for one of the most potent cell survival effectors, promoted the survival of 5-FU-treated colorectal  
14 cancer cells. Altogether, our results demonstrate that "man-made" fluorinated ribosomes favour the  
15 drug-tolerant cellular phenotype by promoting translation of survival genes. This could be exploited  
16 for developing novel combined therapies. By unraveling translation regulation as a novel gene  
17 expression mechanism helping cells to survive a drug-challenge, our study extends the spectrum of  
18 molecular mechanisms driving drug-tolerance.

19 **Main text**

20 Translation regulation plays a major role in controlling gene expression and contributes to diseases  
21 emergence including cancer <sup>10,11</sup>. Within ribosomes, ribosomal RNAs (rRNAs) play a central role in the  
22 translation process, by monitoring codon:anti-codon recognition, coordinating ribosomal subunit  
23 activity and catalysing peptide-bond formation through its ribozyme activity. rRNAs contain over 200  
24 naturally occurring chemical modifications which stabilise rRNA structure and create additional  
25 molecular interactions not provided by non-modified nucleotides<sup>12-14</sup>. Chemical modifications of  
26 rRNAs were shown to directly contribute to translational regulation <sup>11,15,16</sup>. We, and others, showed

1 that rRNA chemical modifications contribute to the fine-tuning of ribosome functions and to  
2 modulating translational activity of ribosomes in cancer cells <sup>17-20</sup>. 5-FU treatment results in 5-  
3 fluorouridine (5-Urd) incorporation into various types of cellular RNA including the precursor of rRNA  
4 <sup>9</sup>. However, the consequences of 5-FUrd incorporation into ribosomal RNA precursor on ribosome  
5 production and functioning have so far not been analysed, neither is its impact on cellular  
6 phenotype.

### 7 **5-FU does not inhibit ribosome production**

8 Previous work indicated that at a high concentration, 5-FU alters ribosome biogenesis without  
9 inhibiting pre-rRNA synthesis <sup>8,21</sup>. To further investigate this, we treated colorectal cancer HCT116  
10 cells with clinically relevant concentrations of 5-FU (10-50  $\mu$ M) <sup>22,23</sup>, which result in growth inhibition  
11 and cell death (<sup>24</sup> and Extended data Fig.1a). Within this concentration range, 5-FU treatment  
12 resulted in enlarged nucleoli, absence of nucleolar cap formation and absence of dispersion of  
13 nucleolar markers, as opposed to cells treated with the RNA Pol I inhibitor actinomycin D (Fig. 1a and  
14 Extended data Fig. 1b-c). Such nucleolar restructuring reveals an alteration of ribosome biogenesis  
15 albeit without pre-rRNA synthesis inhibition, and was confirmed by TEM (Extended data Fig. 1d).  
16 Consistently, 47S/45S pre-rRNA levels, analysed by Northern blotting and RNA fluorescent *in situ*  
17 hybridization (FISH), were unchanged following 5-FU treatment confirming that 5-FU did not affect  
18 RNA Pol I activity (Fig. 1b and Extended data Fig. 1e and Fig. 2a-b).

19 Northern blot analysis also confirmed that ribosome maturation at post-transcriptional steps was  
20 altered, and revealed that the pre-rRNA processing was impaired at the cleavage stage at site 2  
21 (Extended data Fig. 2a-c). Yet, despite this effect, the late pre-rRNA intermediates leading to 18S and  
22 28S rRNA were still detected (Extended data Fig. 2c) suggesting that ribosome production was in part  
23 maintained. This was confirmed by [<sup>32</sup>P] pulse-chase experiments that showed that ribosomes are  
24 produced at significant levels for up to 48 h under 5-FU treatment (Fig. 1c and extended data Fig. 2d).  
25 Thus, at clinically relevant concentration of 5-FU, each step of ribosome processing is able to

1 proceed, despite the stringent quality control, thus allowing ribosome production to be maintained  
2 at a substantial level.

3

#### 4 **5-FU incorporation into ribosomes**

5 5-FU was previously shown to be incorporated in RNAs <sup>9</sup>. We therefore wondered whether  
6 ribosomes produced and exported to the cytoplasm in treated cells contain 5-FUrd within their rRNA.  
7 To this end, we developed a quantitative LC-HRMS approach that now allows us to determine the  
8 number of 5-FU incorporated in rRNA of cytoplasmic ribosomes purified at high stringency (Fig. 2a,  
9 see methods for details <sup>25</sup>). We found that ribosomes contained significant amounts of 5-FUrd,  
10 ranging from 7 to 15 5-FUrd molecules per ribosome upon 24 h of treatment with 5  $\mu$ M to 100  $\mu$ M of  
11 5-FU (Fig. 2b). We ruled-out that the 5-FU signal came from non-ribosomal RNA by measuring 5-FUrd  
12 from gel-purified 18S and 28S rRNA (Extended data Fig. 3a). 5-FU was incorporated into rRNA from  
13 cytoplasmic ribosomes purified from a panel of cell lines representing cancers for which 5-FU-based  
14 therapies are commonly used, including colorectal, pancreatic and triple negative breast cancers (Fig.  
15 2c). Altogether, these data demonstrate that upon 5-FU treatment, ribosomes containing fluorinated  
16 rRNA are fully assembled and exported to the cytoplasm, showing that presence of 5-FUrd is  
17 tolerated by the quality control systems of the cell.

18 Next, we investigated whether fluorinated ribosomes could be produced within tumours *in vivo*.  
19 First, we analysed rRNA from HCT116 xenografts established in nude mice. 5-FU treatment efficacy  
20 was evidenced by a decrease in tumour growth (Extended data Fig. 3b). 5-FU was detected in mature  
21 rRNA purified from tumour cells collected after the last treatment at levels close to those observed in  
22 cultured cells (Fig. 2d). Thus, 5-FU incorporation in ribosomes can be replicated in a common  
23 xenografted animal model. Finally, we analysed rRNA of colorectal tumour cells from patients  
24 treated with 5-FU-based therapies, using large RNA quantities to optimise detection (Extended data  
25 Fig. 3c). Of the 5 samples tested from 5-FU-treated patients, 5-FUrd was detected in rRNA from 2  
26 patients (3.80 and 4.50 5-FUrd per ribosome respectively; Fig. 2e), a patient receiving no 5-FU serving

1 as a negative control. Altogether, these data show that 5-FUrd incorporates into rRNA of cells treated  
2 with 5-FU, and that 5-FU-based chemotherapy leads to the production of fluorinated ribosomes  
3 within tumour cells in animal models and human.

4

#### 5 **Altered translation by Fluorinated ribosomes**

6 Because rRNAs and their post-transcriptional chemical modifications play a central role in ribosome  
7 functioning, and because 5-FU induces changes in translational regulation<sup>24,26,27</sup>, we postulated that  
8 fluorinated ribosomes may display modified translational activity. To investigate this, we first  
9 considered whether fluorinated ribosomes could be recruited onto mRNA during translation, by  
10 analysing the rRNA 5-FU content in actively translating ribosomes isolated by sucrose gradient. 5-FU  
11 was readily detected in actively translating ribosomes, demonstrating that fluorinated ribosomes can  
12 engage in translation (Fig. 3a). Next, we evaluated whether incorporation of 5-FU in rRNA impacts  
13 the translational capacity of ribosomes. We used our recently developed *in vitro* hybrid translation  
14 assay<sup>19,28</sup>, in which ribosomes alone have been exposed to 5-FU, in order to evaluate the activity of  
15 purified fluorinated ribosomes in a controlled setting (Fig. 3b). The translational capacity of  
16 fluorinated ribosomes was assessed using a set of luciferase reporter mRNAs, the translation of  
17 which relies on different 5'UTR: (i) short 5'UTR from globin and GAPDH mRNAs, (ii) long and  
18 structured capped 5'UTR from IGF-1R and c-Myc mRNAs, and (iii) long and structured uncapped  
19 5'UTR from viral mRNA of cricket paralysis virus (CrPV) and encephalomyocarditis virus (EMCV),  
20 which initiate translation through an internal ribosome entry site (IRES). The results showed first that  
21 fluorinated ribosomes were not impaired for translation, and second that they displayed a selective  
22 translation initiation efficacy that differed from that of control ribosomes, and varied according to  
23 the nature of the 5'UTR of the reporter mRNA used (Fig. 3c). Indeed, first, globin and GAPDH were  
24 less efficiently translated, a result that is consistent with lower overall protein synthesis in 5-FU  
25 treated cells<sup>(24)</sup>, and Extended data Fig. 4a). Second, reporter mRNAs containing IGF-1R and c-Myc 5'-  
26 UTR were more efficiently translated by fluorinated ribosomes. These differences suggest that

1 translation efficiency varies according to the nature of the 5'UTR indicating that the initiation step of  
2 translation was different for fluorinated ribosomes compared to normal ribosomes. To consolidate  
3 this hypothesis, translation was tested on a mRNA carrying the CrPV intergenic IRES, an element that  
4 directly binds to the ribosome and initiates translation without any cellular translation initiation  
5 factors (eIFs). Fluorinated ribosomes displayed a decrease translational activity on CrPV mRNA,  
6 strongly supporting that fluorinated ribosomes are structurally or functionally different (Fig. 3d). This  
7 defect in translation initiation from the CrPV intergenic IRES was not strictly related to cap-  
8 independent initiation mechanisms since fluorinated ribosomes were more efficient at translating an  
9 EMCV IRES containing mRNA, another cap-independent translation initiation model (Fig. 3d).  
10 Altogether, these experiments demonstrate that 5-FU incorporation into rRNA modifies the ability of  
11 ribosomes to initiate mRNA translation from different 5'UTR, and highlight that fluorinated  
12 ribosomes might contribute to 5-FU induced translational reprogramming that we previously observed  
13 <sup>24</sup>.

14

### 15 **IGF-1R promotes 5-FU drug-tolerance**

16 The data above suggest that fluorinated ribosomes favour translation of selected mRNAs, including  
17 genes such as *IGF-1R* and *c-Myc*, that may promote early cell survival and lead to resistance <sup>4,29,30</sup>. We  
18 focused on *IGF-1R*, a gene that play a major role in tumorigenesis and whose contribution to cell  
19 survival has been largely demonstrated in various models including colorectal cancer <sup>31-34</sup>. Because 5-  
20 FU treatment induces a decrease in global protein synthesis (<sup>24</sup>, Extended data Fig. 4a), we initially  
21 evaluated whether *IGF-1R* mRNA translation was also impacted by 5-FU treatment in HCT116 cells.  
22 *IGF-1R* mRNA translation efficacy was assessed by measuring the recruitment of cytoplasmic mRNA  
23 into the heavy polysome fraction of control and 5-FU-treated cells (Fig. 4a). Our data show that the  
24 fraction of *IGF-1R* mRNAs associated with heavy polysomes was maintained in 5-FU treated cells,  
25 while that of actin and GAPDH mRNAs decreased, indicating that translation of *IGF-1R* mRNA remains  
26 largely unaltered upon 5-FU treatment. Consistently, the global level of IGF-1R protein was also

1 maintained in treated cells (Fig. 4b and Extended data Fig. 4b). Next, to determine whether the IGF-  
2 1/IGF-1R pathway contributes to the survival of CRC cells exposed to 5-FU, cells were first treated  
3 with 5-FU for 24 h or 48 h, and were subsequently treated with IGF-1. Cell proliferation was  
4 monitored over 5 days, and revealed that while IGF-1 had no impact on control cells, it improved the  
5 growth of cells treated with 5-FU (Fig. 4c and d). To further validate our findings, HCT116 cells were  
6 co-treated with 5-FU and the IGF-1R kinase inhibitor NVP-AEW541<sup>35</sup>, and cell response was  
7 monitored by cell counting using high-content analysis (Fig. 4e). Inhibition of IGF-1R further  
8 decreased the number of cells that survived 5-FU treatment, an observation that was confirmed by  
9 MTS assay (Extended data Fig. 4d), demonstrating that an active IGF-1/IGF-1R pathway is necessary  
10 for optimal cell tolerance to 5-FU. Overall, our results unveil that the IGF-1/IGF-1R pathway plays a  
11 role in the survival of a cell subpopulation upon 5-FU treatment, and strongly support that the 5-FU  
12 driven maintenance of IGF-1R synthesis contributes to this mechanism.

### 13 **Discussion**

14 In this study, we reveal that the pyrimidine analogue 5-FU is incorporated into ribosomes *in vitro* and  
15 *in vivo*, including in human tumours. We used a novel LC-HRMS method that we developed<sup>25</sup> in  
16 order to quantitate the level of incorporation of 5-FUrd in a defined RNA molecule. This approach  
17 allowed us to demonstrate that 5-FUrd is incorporated into ribosome at significant levels, showing  
18 that cells can tolerate the production of non-natural ribosomes. This finding was unexpected because  
19 ribosome assembly and maturation are under stringent quality-control that induces the degradation  
20 of improperly folded and assembled rRNAs<sup>36</sup>, as evidenced by the decrease in the level of the late  
21 pre-rRNA species that we report in this study. As a result, cytoplasmic functional ribosomes  
22 contained up to 15 copies of 5-FUrd per ribosome, a number likely underestimated since only a  
23 fraction of the ribosome population was renewed within the time frame of our experiment. While  
24 addition of fluorine into rRNA results is a non-natural modification, and could be anticipated as  
25 deleterious, we found that fluorinated ribosomes are functional as they engage in translation.  
26 However, their activity is altered and displays a selective ability to initiate mRNA translation

1 according to the nature of its 5'UTR. Hence, fluorine appears to modify the functioning of the rRNA,  
2 since (i) chemical modifications of rRNA including 2'-O-methylation and pseudouridylation were  
3 shown to contribute to translational regulation and efficiency<sup>18,37-39</sup>, and (ii) structural studies of  
4 bacterial and human ribosomes showed that chemically-modified nucleotides establish molecular  
5 interactions that cannot be provided by non-modified ones<sup>12,14</sup>. In particular, the presence of 5-FUrd  
6 in the functional domains of the ribosome, such as the A, P and E sites are more likely to impact  
7 translation. The fine mapping of the location of 5-FUrd within rRNA may improve our understanding  
8 of its impact on ribosome functioning at the atomic level.

9 We previously described a major translational reprogramming induced by 5-FU in colorectal cancer  
10 cells, that we have linked to a miRNA-based mechanism<sup>24</sup>. The fluorination of rRNA that we describe  
11 herein represents an additional mechanism by which 5-FU contributes to translational reprogramming  
12 of treated cells<sup>24</sup>. It is likely that other mechanisms are involved, such as 5-FUrd incorporation into  
13 mRNAs.

14 We determined that the 5-FU altered translational machinery contributes to maintaining the  
15 expression level of the IGF-1R gene, thus promoting cell survival. This suggests that cytotoxic  
16 efficiency of 5-FU may be improved if fluorinated ribosome production is prevented, an approach  
17 that could be effectively tested using the recently developed ribosome biogenesis inhibitors, for  
18 which anti-cancer activities are being unveiled<sup>40-42</sup>. These inhibitors have been positively evaluated  
19 in the context of Myc-driven pathologies, lymphoma and in combination with mTOR inhibitors. Our  
20 data now indicate that this novel class of drugs may be useful for improving non-targeted therapies.

21 Drug-tolerance is a critical phase as it represents a window of opportunity for genetic and non-  
22 genetic events to take place and provide cells with a drug-resistant phenotype. We show that  
23 sustained IGF-1R synthesis is a significant factor for cell survival upon 5-FU treatment. Surprisingly,  
24 our data indicate that 5-FU sensitized cells to IGF-1. It is not clear whether this is directly related to  
25 changes in translational regulation, nevertheless, it suggests that targeting the IGF-1/IGF-1R pathway  
26 may improve 5-FU efficacy. To our knowledge, this is the first line of evidence that the IGF-1/IGF-1R



1 pathway might contribute to drug-tolerance. 5-FU is the most widely used chemotherapy, and there  
2 is a high demand for improving its efficacy. Our data highlight the potential benefits of understanding  
3 drug-tolerance mechanisms in response to 5-FU, which has so far not been fully described. In  
4 addition, while our study focused on a base analogue incorporated into RNA, other compounds  
5 binding to RNAs such as platin derivatives or any drug that might interfere with RNA metabolism  
6 should now also be considered as modifiers of ribosome structure and activity <sup>43</sup>, and may also  
7 contribute to altering translational regulation in treated cells, with a deleterious impact for patient  
8 outcome.

9 Altogether, our study extends the spectrum of gene expression mechanisms that help cells survive a  
10 drug-challenge, by adding translational regulation to epigenetics, stress response, metabolism  
11 adaptation and stemness or dormancy phenotypes <sup>1,2,4,44-46</sup>. These findings also reveal that exposure  
12 to drugs can result in the production of new “man-made” biological complexes, the functioning of  
13 which cannot be anticipated, and that require further studies to fully comprehend drug response and  
14 propose new therapeutic strategies.

15

## 16 **References**

- 17 1. Nassar, D. & Blanpain, C. Cancer Stem Cells: Basic Concepts and Therapeutic Implications.  
18 *Annu. Rev. Pathol. Mech. Dis.* **11**, 47–76 (2016).
- 19 2. Recasens, A. & Munoz, L. Targeting Cancer Cell Dormancy. *Trends Pharmacol. Sci.* **40**, 128–141  
20 (2019).
- 21 3. Vallette, F., Olivier, C., Lezot, F. & Oliver, L. Dormant, quiescent, tolerant and persister cells:  
22 Four synonyms for the same target in cancer. doi:10.1016/j.bcp.2018.11.004i
- 23 4. Pisco, A. O. & Huang, S. Non-genetic cancer cell plasticity and therapy-induced stemness in  
24 tumour relapse : ‘ What does not kill me strengthens me ’. *Br. J. Cancer* 1725–1732 (2015).  
25 doi:10.1038/bjc.2015.146
- 26 5. Pettersen, H. S. *et al.* UNG-initiated base excision repair is the major repair route for 5-

- 1 fluorouracil in DNA, but 5-fluorouracil cytotoxicity depends mainly on RNA incorporation.  
2 *Nucleic Acids Res.* **39**, 8430–8444 (2011).
- 3 6. Pritchard, D. M., Watson, a J., Potten, C. S., Jackman, A. L. & Hickman, J. A. Inhibition by  
4 uridine but not thymidine of p53-dependent intestinal apoptosis initiated by 5-fluorouracil:  
5 evidence for the involvement of RNA perturbation. *Proc Natl Acad Sci U S A* **94**, 1795–1799  
6 (1997).
- 7 7. Takimoto, C. H., Tan, Y. Y., Cadman, E. C. & Armstrong, R. D. Correlation between ribosomal  
8 RNA production and RNA-directed fluoropyrimidine cytotoxicity. *Biochem. Pharmacol.* **36**,  
9 3243–3248 (1987).
- 10 8. Greenhalgh, D. A. & Parish, J. H. Effect of 5-fluorouracil combination therapy on rna  
11 processing in human colonic carcinoma cells. *Br. J. Cancer* **61**, 415–419 (1990).
- 12 9. Longley, D. B., Harkin, D. P. & Johnston, P. G. 5-Fluorouracil: Mechanisms of action and clinical  
13 strategies. *Nat. Rev. Cancer* **3**, 330–338 (2003).
- 14 10. Robichaud, N., Sonenberg, N., Ruggero, D. & Schneider, R. J. Translational Control in Cancer.  
15 *Cold Spring Harb. Perspect. Biol.* **11**, a032896 (2019).
- 16 11. Pelletier, J., Thomas, G. & Volarevi, S. Ribosome biogenesis in cancer: New players and  
17 therapeutic avenues. *Nat. Rev. Cancer* **18**, 51–63 (2017).
- 18 12. Natchiar, S. K., Myasnikov, A. G., Kratzat, H., Hazemann, I. & Klaholz, B. P. Visualization of  
19 chemical modifications in the human 80S ribosome structure. *Nature* **551**, 472–477 (2017).
- 20 13. Khatter, H., Myasnikov, A. G., Natchiar, S. K. & Klaholz, B. P. Structure of the human 80S  
21 ribosome. *Nature* **520**, 640–645 (2015).
- 22 14. Polikanov, Y. S., Melnikov, S. V, Soll, D. & Steitz, T. A. Structural insights into the role of rRNA  
23 modifications in protein synthesis and ribosome assembly. *Nat Struct Mol Biol* **22**, 342–344  
24 (2015).
- 25 15. Truitt, M. L. & Ruggero, D. New frontiers in translational control of the cancer genome. *Nat*  
26 *Rev Cancer* **16**, 288–304 (2016).

- 1 16. Xue, S. & Barna, M. Specialized ribosomes: a new frontier in gene regulation and organismal  
2 biology. *Nat Rev Mol Cell Biol* **13**, 355–369 (2012).
- 3 17. Decatur, W. A. & Fournier, M. J. rRNA modifications and ribosome function. *Trends Biochem*  
4 *Sci* **27**, 344–351 (2002).
- 5 18. Penzo, M. *et al.* Human ribosomes from cells with reduced dyskerin levels are intrinsically  
6 altered in translation. *FASEB J* **29**, 3472–3482 (2015).
- 7 19. Erales, J. *et al.* Evidence for rRNA 2'-O-methylation plasticity: Control of intrinsic translational  
8 capabilities of human ribosomes. *Proc. Natl. Acad. Sci.* **114**, 12934–12939 (2017).
- 9 20. Marcel, V. *et al.* P53 Acts as a Safeguard of Translational Control by Regulating Fibrillarin and  
10 rRNA Methylation in Cancer. *Cancer Cell* **24**, 318–330 (2013).
- 11 21. Burger, K. *et al.* Chemotherapeutic drugs inhibit ribosome biogenesis at various levels. *J Biol*  
12 *Chem* **285**, 12416–12425 (2010).
- 13 22. Casale, F. *et al.* Plasma concentrations of 5-fluorouracil and its metabolites in colon cancer  
14 patients. *Pharmacol. Res.* **50**, 173–179 (2004).
- 15 23. Trump, B. D. L. *et al.* Pharmacokinetic and Pharmacodynamic Analysis of Fluorouracil During  
16 72-Hour Continuous Infusion With and Without Dipyridamole. **9**, 2027–2035 (1991).
- 17 24. Bash-Imam, Z. *et al.* Translational reprogramming of colorectal cancer cells induced by 5-  
18 fluorouracil through a miRNA-dependent mechanism. *Oncotarget* **8**, 46219–46233 (2017).
- 19 25. Machon, C. *et al.* Study of intracellular anabolism of 5-fluorouracil and incorporation in  
20 nucleic acids based on a LC-HRMS method. *J. Pharm. Anal.* (2020).  
21 doi:10.1016/J.JPHA.2020.04.001
- 22 26. Xi, Y., Nakajima, G., Schmitz, J. C., Chu, E. & Ju, J. Multi-level gene expression profiles affected  
23 by thymidylate synthase and 5-fluorouracil in colon cancer. *BMC Genomics* **7**, 1–15 (2006).
- 24 27. Kudo, K. *et al.* Translational control analysis by translationally active RNA capture/microarray  
25 analysis (TriP-Chip). *Nucleic Acids Res.* **38**, 1–9 (2010).
- 26 28. Panthu, B., Decimo, D., Balvay, L. & Ohlmann, T. In vitro translation in a hybrid cell free lysate

- 1 with exogenous cellular ribosomes. *Biochem J* **467**, 387–398 (2015).
- 2 29. Sharma, S. V *et al.* A Chromatin-Mediated Reversible Drug-Tolerant State in Cancer Cell  
3 Subpopulations. *Cell* **141**, 69–80 (2010).
- 4 30. Rambow, F. *et al.* Toward Minimal Residual Disease-Directed Therapy in Melanoma. *Cell* **174**,  
5 843–855.e19 (2018).
- 6 31. Hopfner, M., Sutter, A. P., Huether, A., Baradari, V. & Scherubl, H. Tyrosine kinase of insulin-  
7 like growth factor receptor as target for novel treatment and prevention strategies of  
8 colorectal cancer. *World J. Gastroenterol.* **12**, 5635–43 (2006).
- 9 32. Larsson, O., Girnita, A. & Girnita, L. Role of insulin-like growth factor 1 receptor signalling in  
10 cancer. *Br. J. Cancer* **92**, 2097–2101 (2005).
- 11 33. Lovly, C. M. *et al.* Rationale for co-targeting IGF-1R and ALK in ALK fusion--positive lung  
12 cancer. *Nat. Med.* **20**, 1027–1034 (2014).
- 13 34. Sharma, S. V. *et al.* A Chromatin-Mediated Reversible Drug-Tolerant State in Cancer Cell  
14 Subpopulations. *Cell* (2010). doi:10.1016/j.cell.2010.02.027
- 15 35. García-Echeverría, C. *et al.* In vivo antitumor activity of NVP-AEW541 - A novel, potent, and  
16 selective inhibitor of the IGF-IR kinase. *Cancer Cell* **5**, 231–239 (2004).
- 17 36. Peña, C., Hurt, E. & Panse, V. G. Eukaryotic ribosome assembly, transport and quality control.  
18 *Nat. Struct. Mol. Biol.* **24**, 689–699 (2017).
- 19 37. Jack, K. *et al.* rRNA pseudouridylation defects affect ribosomal ligand binding and translational  
20 fidelity from yeast to human cells. *Mol Cell* **44**, 660–666 (2011).
- 21 38. Erales, J. *et al.* Evidence for rRNA 2'-O-methylation plasticity: Control of intrinsic translational  
22 capabilities of human ribosomes. *Proc Natl Acad Sci USA* **8**, 201707674 (2017).
- 23 39. Marcel, V. *et al.* p53 Acts as a Safeguard of Translational Control by Regulating Fibrillarin and  
24 rRNA Methylation in Cancer. *Cancer Cell* **24**, 318–330 (2013).
- 25 40. Catez, F. *et al.* Ribosome biogenesis : An emerging druggable pathway for cancer therapeutics  
26 Transcription Nucleus Nucleolus rRNA Processing Assembly Mature Cytoplasm Translation.

- 1           *Biochem. Pharmacol.* **159**, 74–81 (2019).
- 2   41.   Peltonen, K. *et al.* A targeting modality for destruction of RNA polymerase I that possesses  
3           anticancer activity. *Cancer Cell* **25**, 77–90 (2014).
- 4   42.   Devlin, J. R. *et al.* Combination therapy targeting ribosome biogenesis and mRNA translation  
5           synergistically extends survival in MYC-driven lymphoma. *Cancer Discov.* **6**, 59–70 (2016).
- 6   43.   Melnikov, S. V., Söll, D., Steitz, T. A. & Polikanov, Y. S. Insights into RNA binding by the  
7           anticancer drug cisplatin from the crystal structure of cisplatin-modified ribosome. *Nucleic*  
8           *Acids Res.* **44**, 4978–4987 (2016).
- 9   44.   Roesch, A. *et al.* Overcoming intrinsic multidrug resistance in melanoma by blocking the  
10          mitochondrial respiratory chain of slow-cycling JARID1B<sup>high</sup> cells. *Cancer Cell* **23**, 811–825  
11          (2013).
- 12   45.   Dagogo-Jack, I. & Shaw, A. T. Crizotinib resistance: implications for therapeutic strategies.  
13          *Ann. Oncol. Off. J. Eur. Soc. Med. Oncol.* **27 Suppl 3**, iii42--iii50 (2016).
- 14   46.   Su, Y. *et al.* Single-cell analysis resolves the cell state transition and signaling dynamics  
15          associated with melanoma drug-induced resistance. *Proc. Natl. Acad. Sci. U. S. A.* **114**, 13679–  
16          13684 (2017).
- 17
- 18
- 19

## 1 **Acknowledgements**

2 We thank E. Errazuriz (Centre d'Imagerie Quantitative Lyon-Est) and C. Vanbelle (plateau d'imagerie  
3 du CRCL) for technical help. We thank Brigitte Manship for editing the manuscript. G.T. and S.N-S.  
4 were recipient of a Ph.D. fellowship from la Ligue Nationale Contre le Cancer and from "La Fondation  
5 pour la Recherche Médicale". MG was supported by ANR Grant "INVADE" PC201507. The project was  
6 supported by the "Ligue Contre le Cancer, comités départementaux de la Drôme, du Rhône, du Puy-  
7 de-Dôme, et de l'Allier", by Agence Nationale de la Recherche (grant RiboMeth - ANR-13-BSV8-0012),  
8 by the Institut National du Cancer (INCa, grant FluoRib - PLBIO18-131) and by Programmes d'Actions  
9 Intégrées de Recherche (PAIR Sein, RiboTEM, ARC\_INCa\_LNCC\_7625). NDV, AV, JP and FC are CNRS  
10 research fellow. JJD, and VM are Inserm research fellows.

11

12

## 13 **Author contributions**

14 G.T., Z. B-I., B.P., J.G., C.M., A.V., S.N-S., M.G., M. C-D., F.L., V.M., G.S., S.H., M-A. A., J.B.V., J.P. and  
15 F.C. performed experiments. G.T., J.G., V.M., H.C.M., J.C.S., N.D.V., T.O., J.P., F.C. and J-J.D. designed  
16 experiments. M.P. and M.B. provided human biopsies. T.O., J.P., J.G., N.D.V., F.C and J-J.D. designed  
17 and supervised the study. F.C. and J-J.D. wrote the paper.

18

## 19 **Data availability**

20 All data and materials are available from the authors upon reasonable request.

21

1 **Legends to figure**

2 **Fig. 1. Ribosome production is maintained in 5-FU-treated cells.** HCT116 cells were treated with 5-  
3 FU at 10  $\mu$ M or 50  $\mu$ M for 24 h or 48 h or with actinomycin D (Act.D) for 3 h as a reference of rRNA  
4 synthesis inhibition. **a**, Morphology of nucleoli analysed by immunofluorescent detection of nucleolar  
5 markers nucleolin (NCL, red) and fibrillarin (FBL, green). Nuclei were stained with Hoechst (blue)  
6 Scale bar = 10  $\mu$ M. **b**, Pre-rRNA synthesis analysed by detection of 47S/45S rRNA precursor levels by  
7 Northern blotting. Data are expressed as mean values  $\pm$  s.d. of independent experiments (n = 3). **c**,  
8 Rate of 28S and 18S rRNAs production analysed by isotope pulse labelling. Radioactivity was  
9 measured for each rRNA and normalised against ethidium bromide. Data are expressed as mean  $\pm$ /  
10 s.d. of independent experiments (n = 3). Results of unpaired two-tailed t-test are indicated as non-  
11 significant (ns) p<0.05 (\*), p<0.01 (\*\*), p<0.001 (\*\*\*) and p<0.0001 (\*\*\*\*).

12  
13 **Fig. 2. 5-FU is incorporated in ribosomes of cell lines and tumours.** **a**, Schematic representation of 5-  
14 FUrd incorporation into ribosomes determined using LC-HRMS. **b**, HCT116 cells were treated for 24 h  
15 with 5 to 100  $\mu$ M 5-FU and 5-FUrd incorporation was determined as in **a**. Data are expressed as mean  
16  $\pm$  s.d. of independent experiments (n = 3). **c**, Indicated cell lines were treated for 24 h with 10  $\mu$ M  
17 of 5-FU and incorporation of 5-FUrd into rRNA was determined as in **a**. Data are expressed as mean  
18  $\pm$  s.d. of independent experiments (n = 3). **d**, HCT116 cells were xenografted into nude mice, and  
19 mice were treated with 50 mg/kg of 5-FU twice a week (5-FU) or with PBS (Control). Incorporation of  
20 5-FUrd into rRNA was determined as in **a**. Data are values for individual animals (n = 1). **e**, rRNA were  
21 purified from total RNA extracted from colorectal cancer samples. Incorporation of 5-FUrd into rRNA  
22 was determined as in **a**. Pt = sample from 5-FU treated patient, CT Pt = sample from patient not  
23 treated with 5-FU. n = 1 for each sample.

24

25 **Fig. 3. Fluorinated ribosomes display altered translational properties.**

1 **a**, HCT116 cells were treated for 24 h with either 10  $\mu$ M or 50  $\mu$ M 5-FU, and translationally active  
2 ribosomes were purified from the polysomal fraction. Incorporation of 5-FUrd was measured by LC-  
3 HRMS. Data are expressed as mean  $\pm$  s.d of independent experiments (n = 3). **b**, Schematic  
4 representation of the hybrid *in vitro* translation assay used in **c** and **d**. **c**, and **d**, Ribosomes were  
5 purified from HCT116 cells treated with 10  $\mu$ M 5-FU for 24 h or 48 h, and their translational activity  
6 was evaluated using the hybrid *in vitro* translation assay. Translation efficacy was evaluated on  
7 luciferase reporter mRNA containing the 5'-UTR of the indicated gene. Values are units of Renilla  
8 luciferase activity normalised against the untreated (NT) condition. **c**, Evaluation on capped mRNA  
9 containing the 5'UTR of actin, GAPDH, IGF-1R and c-Myc genes. **d**, Evaluation on uncapped mRNA  
10 containing the IRES element from the cricket paralysis virus (CrPV) and the encephalomyocarditis  
11 virus (EMCV). Data are expressed as mean  $\pm$  s.d. of independent experiments (n = 3). Results of  
12 unpaired two-tailed t-test are indicated as non-significant (ns)  $p < 0.05$  (\*),  $p < 0.01$  (\*\*),  $p < 0.001$  (\*\*\*)  
13 and  $p < 0.0001$  (\*\*\*\*).

14

15 **Fig. 4. IGF-1R contributes to survival and recovery of 5-FU treated CRC cells.**

16 **a, b**, HCT116 cells were treated with 10  $\mu$ M or 50  $\mu$ M 5-FU for 24 h or 48 h or untreated (NT). **a**,  
17 Translation efficiency of actin, GAPGH and IGF-1R mRNAs. Each mRNA was quantified from  
18 cytoplasmic and polysomal fractions. Translation efficiency are shown as the ratio of polysomic  
19 mRNA over the cytoplasmic mRNA. Each dot represents an individual biological sample measured in  
20 duplicate and data are expressed as mean  $\pm$  s.d of independent experiments (n = 3). **b**, Level of IGF-  
21 1R protein (left) and GAPDH protein (right) normalised against the Ku80 housekeeping gene,  
22 quantified from Western blot. Each dot represents an individual biological sample and data are  
23 expressed as mean  $\pm$  s.d of independent experiments (n = 3). **c, d**, HCT116 cells were treated with 10  
24  $\mu$ M 5-FU for 24 h or 48 h or NT, and not stimulated (No IGF-1) or stimulated with 5 or 10 ng/mL of  
25 IGF-1. Cell growth was monitored in real-time over 5 days. **c**, Schematic representation of the  
26 experiment. **d**, Growth rate measured over 72 h (day 6 to day 9). Each dot represents a technical



1 replicate and data are expressed as mean  $\pm$  s.d. **e**, HCT116 cells were treated with 10  $\mu$ M of 5-FU  
2 alone or with 5  $\mu$ M of IGF-1R inhibitor NVP-AEW541 for 48 h, or NT. The number of cells per well was  
3 counted by image analysis. Each dot represents a technical replicate and data are expressed as mean  
4  $\pm$  s.d. of independent experiments (n = 3). Results of unpaired two-tailed t-test are indicated as non-  
5 significant (ns) p<0.05 (\*), p<0.01 (\*\*), p<0.001 (\*\*\*) and p<0.0001 (\*\*\*\*).

6

7

**Extended data Table 1: Sequence of oligonucleotides used in this study**

| <b>Target</b>        | <b>Application</b> | <b>Primer</b> | <b>Sequence</b>                |
|----------------------|--------------------|---------------|--------------------------------|
| <b>Actin</b>         | RT-qPCR            | F             | ATGATATCGCCGCGCTCG             |
|                      |                    | R             | CGCTCGGTGAGGATCTTCA            |
| <b>GAPDH</b>         | RT-qPCR            | F             | AGCCACATCGCTCAGACAC            |
|                      |                    | R             | GCCCAATACGACCAAATCC            |
| <b>IGF-1R</b>        | RT-qPCR            | F             | AAAAACCTTCGCCTCATCC            |
|                      |                    | R             | TGGTTGTCGAGGACGTAGAAA          |
| <b>Pre-rRNA ETS1</b> | Northern blot      |               | CGCTAGAGAAGGCTTTTCTC           |
| <b>Pre-rRNA ITS1</b> | Northern blot      |               | CCTCTTCGGGGGACGCGCGCGTGGCCCCGA |
| <b>Pre-rRNA ITS2</b> | Northern blot      |               | GCGCGACGGCGGACGACACCGCGGCGTC   |

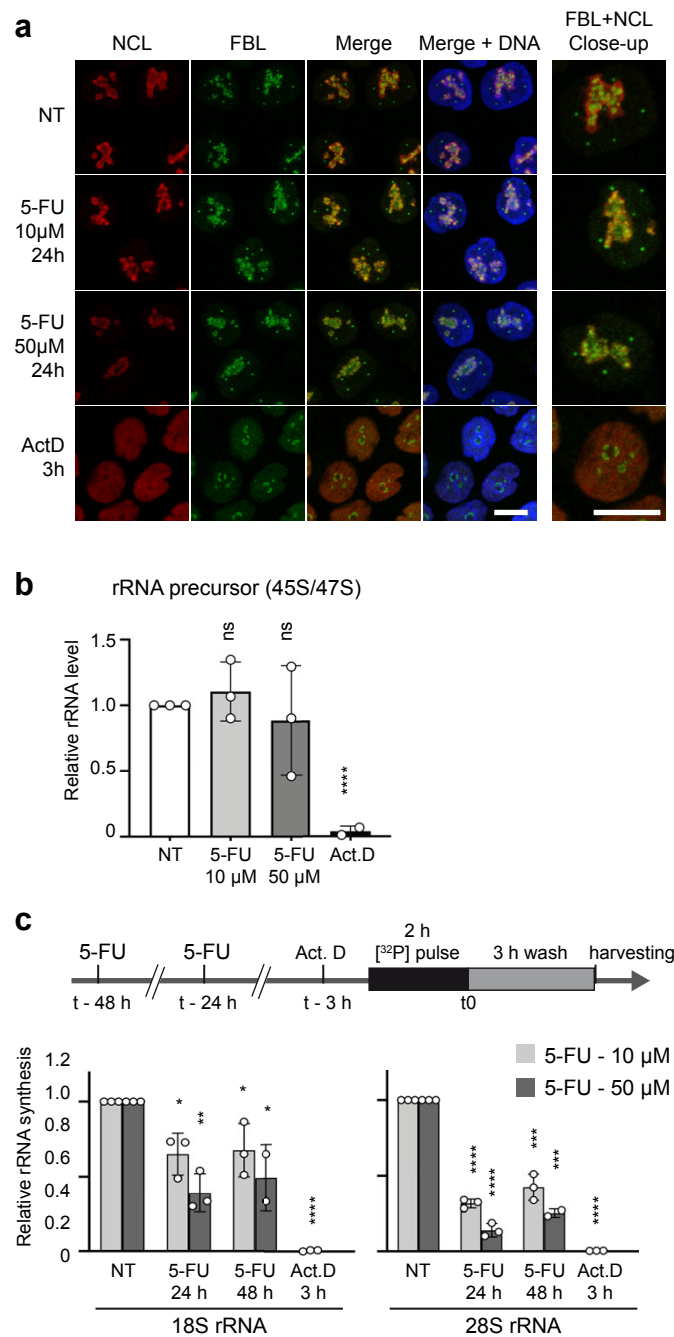

### Fig. 1. Ribosome production is maintained in 5-FU-treated cells.

HCT116 cells were treated with 5-FU at 10 µM or 50 µM for 24 h or 48 h or with actinomycin D (Act.D) for 3 h as a reference of rRNA synthesis inhibition.

**a**, Morphology of nucleoli analysed by immunofluorescent detection of nucleolar markers nucleolin (NCL, red) and fibrillarlin (FBL, green). Nuclei were stained with Hoechst (blue) Scale bar = 10 µM.

**b**, Pre-rRNA synthesis analysed by detection of 47S/45S rRNA precursor levels by Northern blotting. Data are expressed as mean values +/- s.d. of independent experiments (n = 3).

**c**, Rate of 28S and 18S rRNAs production analysed by isotope pulse labelling. Radioactivity was measured for each rRNA and normalised against ethidium bromide. Data are expressed as mean +/- s.d. of independent experiments (n = 3). Results of unpaired two-tailed t-test are indicated as non-significant (NS) p<0.05 (\*), p<0.01 (\*\*), p<0.001 (\*\*\*) and p<0.0001 (\*\*\*\*).

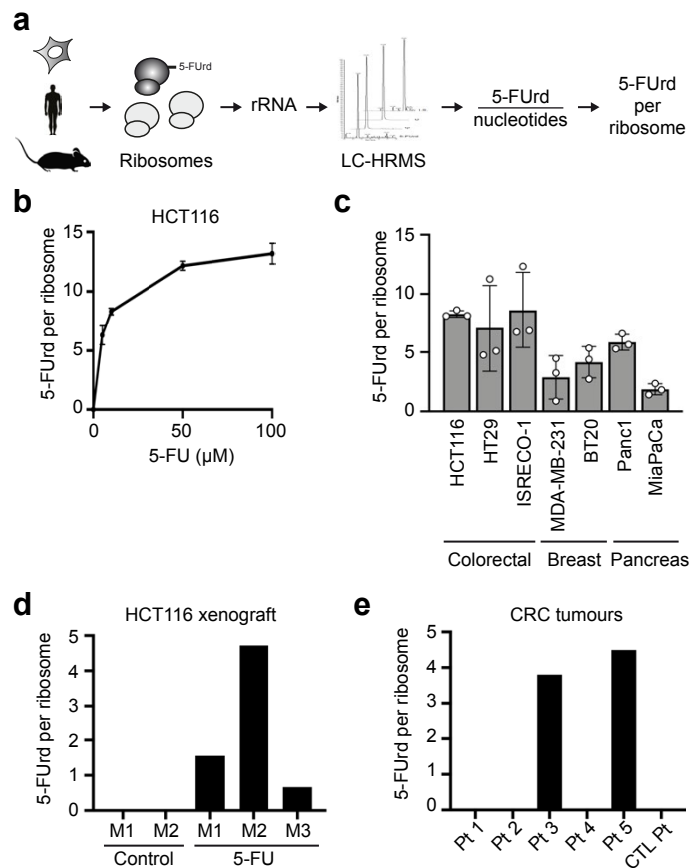

**Fig. 2. 5-FU is incorporated in ribosomes of cell lines and tumours.**

**a**, Schematic representation of 5-FUrd incorporation into ribosomes determined using LC-HRMS.

**b**, HCT116 cells were treated for 24 h with 5 to 100  $\mu$ M 5-FU and 5-FUrd incorporation was determined as in a. Data are expressed as mean  $\pm$  s.d. of independent experiments ( $n = 3$ ).

**c**, Indicated cell lines were treated for 24 h with 10  $\mu$ M of 5-FU and incorporation of 5-FUrd into rRNA was determined as in a. Data are expressed as mean  $\pm$  s.d. of independent experiments ( $n = 3$ ).

**d**, HCT116 cells were xenografted into nude mice, and mice were treated with 50 mg/kg of 5-FU twice a week (5-FU) or with PBS (Control). Incorporation of 5-FUrd into rRNA was determined as in a. Data are values for individual animals ( $n = 1$ ).

**e**, rRNA were purified from total RNA extracted from colorectal cancer samples. Incorporation of 5-FUrd into rRNA was determined as in a. Pt = sample from 5-FU treated patient, CT Pt = sample from patient not treated with 5-FU.  $n = 1$  for each sample.

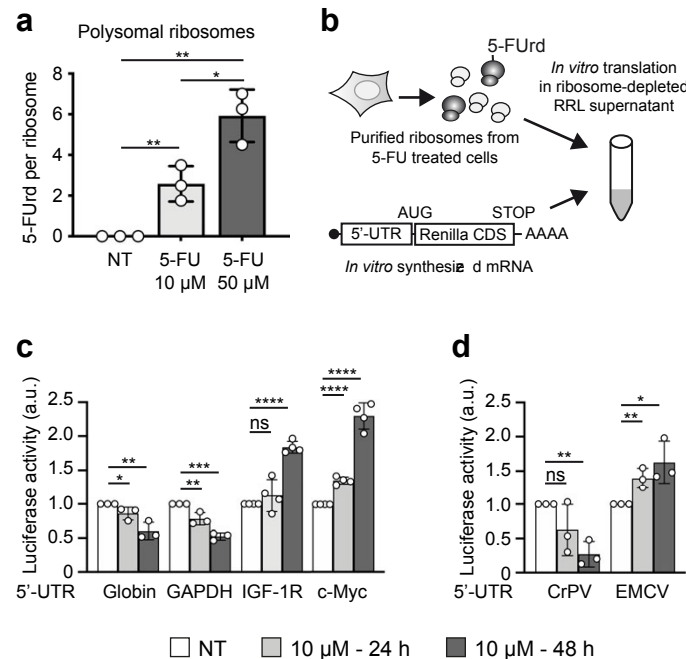

### Fig. 3. Fluorinated ribosomes display altered translational properties.

**a**, HCT116 cells were treated for 24 h with either 10 μM or 50 μM 5-FU, and translationally active ribosomes were purified from the polysomal fraction. Incorporation of 5-FUrd was measured by LC-HRMS. Data are expressed as mean +/- s.d of independent experiments (n = 3).

**b**, Schematic representation of the hybrid in vitro translation assay used in c and d.

**c**, and **d**, Ribosomes were purified from HCT116 cells treated with 10 μM 5-FU for 24 h or 48 h, and their translational activity was evaluated using the hybrid in vitro translation assay. Translation efficacy was evaluated on luciferase reporter mRNA containing the 5'-UTR of the indicated gene. Values are units of Renilla luciferase activity normalised against the untreated (NT) condition.

**c**, Evaluation on capped mRNA containing the 5'UTR of actin, GAPDH, IGF-1R and c-Myc genes.

**d**, Evaluation on uncapped mRNA containing the IRES element from the cricket paralysis virus (CrPV) and the encephalomyocarditis virus (EMCV). Data are expressed as mean +/- s.d. of independent experiments (n = 3).

Results of unpaired two-tailed t-test are indicated as non-significant (ns) p<0.05 (\*), p<0.01 (\*\*), p<0.001 (\*\*\*) and p<0.0001 (\*\*\*\*).

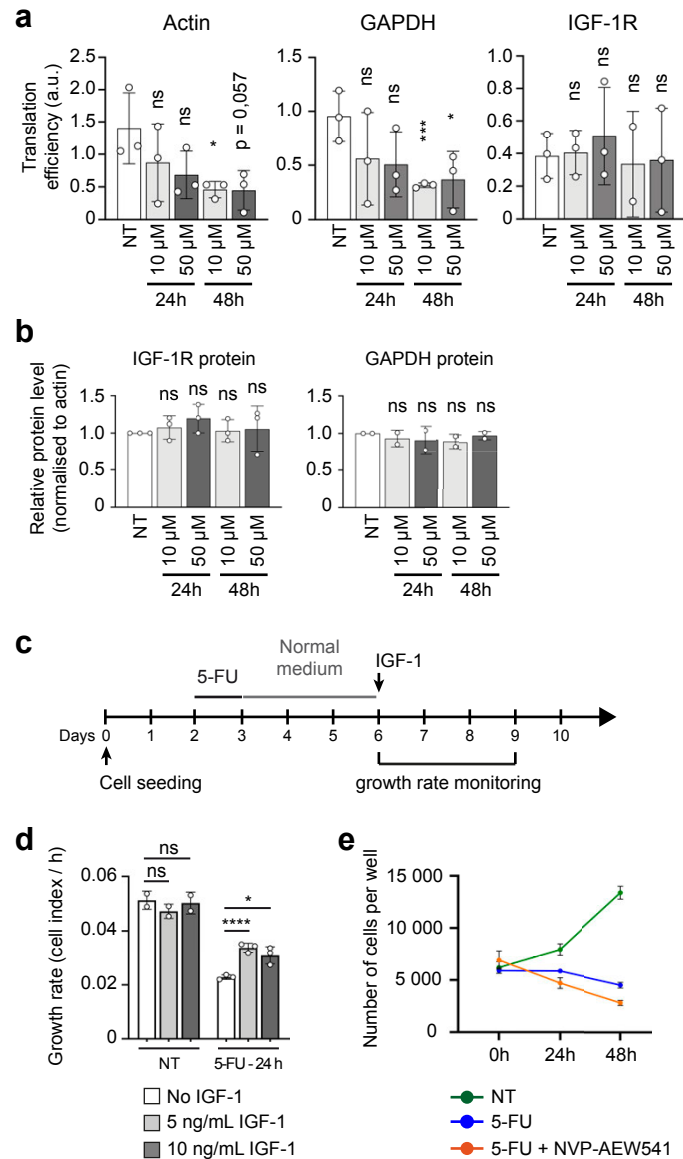

#### Fig. 4. IGF-1R contributes to survival and recovery of 5-FU treated CRC cells.

**a, b**, HCT116 cells were treated with 10  $\mu$ M or 50  $\mu$ M 5-FU for 24 h or 48 h or untreated (NT).

**a**, Translation efficiency of actin, GAPGH and IGF-1R mRNAs. Each mRNA was quantified from cytoplasmic and polysomal fractions. Translation efficiency are shown as the ratio of polysomic mRNA over the cytoplasmic mRNA. Each dot represents an individual biological sample measured in duplicate and data are expressed as mean  $\pm$  s.d.

**b**, Level of IGF-1R protein (left) and GAPDH protein (right) normalised against the Ku80 housekeeping gene, quantified from Western blot. Each dot represents an individual biological sample and data are expressed as mean  $\pm$  s.d.

**c, d**, HCT116 cells were treated with 10  $\mu$ M 5-FU for 24 h or 48 h or NT, and not stimulated (No IGF-1) or stimulated with 5 or 10 ng/mL of IGF-1. Cell growth was monitored in real-time over 5 days.

**c**, Schematic representation of the experiment.

**d**, Growth rate measured over 72 h (day 6 to day 9). Each dot represents a technical replicate and data are expressed as mean  $\pm$  s.d.

**e**, HCT116 cells were treated with 10  $\mu$ M of 5-FU alone or with 5  $\mu$ M of IGF-1R inhibitor NVP-AEW541 for 48 h, or NT. The number of cells per well was counted by image analysis. Each dot represents a technical replicate and data are expressed as mean  $\pm$  s.d.

Results of unpaired two-tailed t-test are indicated as non-significant (ns)  $p < 0.05$  (\*),  $p < 0.01$  (\*\*),  $p < 0.001$  (\*\*\*) and  $p < 0.0001$  (\*\*\*\*).
